# Supplementary material for: Mapping registered nurse anaesthetists’ intraoperative work: tasks, multitasking, interruptions and their causes, and interactions: a prospective observational study
Source: HighWire-hosted journal article supplement (doi:10.1136/bmjopen-2021-052283), 2022-01-01
Supplement: bmjopen-2021-052283supp001_data_supplement.pdf [file bmjopen-2021-052283supp001_data_supplement.pdf]

## APPENDIX 1

| Task categories and subcategories                 | Definitions                                                           | Included activities                                                                                                                                  |
|---------------------------------------------------|-----------------------------------------------------------------------|------------------------------------------------------------------------------------------------------------------------------------------------------|
| <b>Pre indirect care</b>                          | Tasks indirectly related to patient care prior to patient arrival     |                                                                                                                                                      |
| Disinfect                                         |                                                                       | Pre-operative handwashing/disinfection                                                                                                               |
| Organise/arrange                                  |                                                                       | Organising the room, preparing equipment                                                                                                             |
| Control/count                                     |                                                                       | Checking the equipment, devices and operation table                                                                                                  |
| Read                                              |                                                                       | Reading/searching patient information                                                                                                                |
| Clean                                             |                                                                       | Arranging and cleaning                                                                                                                               |
| Protect                                           |                                                                       | Applying sterile gown, gloves, apron                                                                                                                 |
| <b>Intra indirect care</b>                        | Tasks indirectly related to patient care, when the patient is present |                                                                                                                                                      |
| Observe/monitor                                   |                                                                       | Monitoring patient's vital parameters                                                                                                                |
| Disinfect                                         |                                                                       | Handwashing/disinfection                                                                                                                             |
| Organise/arrange                                  |                                                                       | Preparing equipment                                                                                                                                  |
| Control/count                                     |                                                                       | Controlling technical equipment                                                                                                                      |
| Read                                              |                                                                       | Reading and reviewing patient information                                                                                                            |
| Clean                                             |                                                                       | Arranging and cleaning                                                                                                                               |
| Protect                                           |                                                                       | Applying protective apron or gloves                                                                                                                  |
| <b>Direct care</b>                                | Tasks directly related to patient care                                |                                                                                                                                                      |
| Skin disinfection                                 |                                                                       | Disinfecting the incision area                                                                                                                       |
| Drape                                             |                                                                       | Assisting in draping the patient                                                                                                                     |
| Assist                                            |                                                                       | Assisting another professional                                                                                                                       |
| Instrumentation                                   |                                                                       | Instrumentation if needed                                                                                                                            |
| Perform invasive surgical/ anaesthetic procedures |                                                                       | Performing the procedure/intubation, inserting intravenous lines                                                                                     |
| Perform patient care                              |                                                                       | Communicating with the patient, mobilising the patient, dressing the wound, moving the patient to the bed                                            |
| <b>Medication</b>                                 | Tasks related to providing medication to a patient                    |                                                                                                                                                      |
| Prepare                                           |                                                                       | Reading prescriptions, preparing syringes                                                                                                            |
| Administer                                        |                                                                       | Giving medication to the patient                                                                                                                     |
| Document                                          |                                                                       | Documenting medication care                                                                                                                          |
| Communicate                                       |                                                                       | Discussing medication care and prescriptions, asking for clarification                                                                               |
| <b>Documentation</b>                              | Any recording of patient information on paper or computer             |                                                                                                                                                      |
| <b>Communication</b>                              | Any work-related or social discussion with another staff member       |                                                                                                                                                      |
| Professional                                      |                                                                       | Discussions related to the procedure, planning the care of the patient, paging surgeon or anaesthesiologist, reporting, completing the WHO checklist |
| Irrelevant                                        |                                                                       | Case-irrelevant communication                                                                                                                        |
| <b>Supervision</b>                                | Any activity focused on teaching or education                         | <i>(Note: When supervision is taking place, all other tasks are 'multitasking'.)</i>                                                                 |
| <b>Other</b>                                      | Any other task not included above                                     | For example: Waiting for a colleague or a decision, when there is no communication                                                                   |
| <b>In transit</b>                                 | Any movement between rooms                                            | Transferring the patient into and out of the OR<br>Getting equipment needed                                                                          |
